# Supplementary material for: SCAR/WAVE complex recruitment to a supracellular actomyosin cable by myosin activators and a junctional Arf-GEF during Drosophila dorsal closure
Source: PubMed Central journal article supplement — Mol Biol Cell. 2022 Jun 13;33(8):br12. doi: 10.1091/mbc.E22-03-0107 (PMC9635279; doi:10.1091/mbc.e22-03-0107), 2022-06-13
Supplement: mbc-33-br12-s002.pdf [file mbc-33-br12-s002.pdf]

# SCAR/WAVE complex recruitment to a supracellular actomyosin cable by myosin activators and a junctional Arf-GEF during *Drosophila* dorsal closure

Erin Hunt, Hrishika Rai, and Tony Harris

*Corresponding author(s): Tony Harris, Univ of Toronto*

---

## Review Timeline:

|                     |            |
|---------------------|------------|
| Submission Date:    | 2022-03-25 |
| Editorial Decision: | 2022-04-06 |
| Revision Received:  | 2022-04-13 |
| Accepted:           | 2022-04-17 |

---

*Editor-in-Chief: Matthew Welch*

## Transaction Report:

(Note: With the exception of the correction of typographical or spelling errors that could be a source of ambiguity, letters and reports are not edited. The original formatting of letters and referee reports may not be reflected in this compilation.)

RE: Manuscript #E22-03-0107

TITLE: "SCAR/WAVE complex recruitment to a supracellular actomyosin cable by myosin activators and a junctional Arf-GEF during *Drosophila* dorsal closure"

Dear Tony,

Thank you for submitting your manuscript, 'SCAR/WAVE complex recruitment to a supracellular actomyosin cable by myosin activators and a junctional Arf-GEF during *Drosophila* dorsal closure', to MBC. I have carefully reviewed the comments from your previous reviews at *Development* together with your responses. I agree with you that you have addressed most of the significant concerns raised by those reviewers. However, like two of the reviewers I am confused by your genetic interaction experiment. If I understand the figure correctly trans-heterozygous males and females were intercrossed and the phenotypes of the resulting offspring assayed for phenotypes. If so, I agree with reviewer 1 that the differences likely simply represent additive effects from 2 chromosomes containing deleterious mutations. A genetic interaction would require showing phenotypic enhancement from being heterozygous for one (recessive) mutation while simultaneously homozygous for the other mutation. In the experimental design described in Figure 5, because Scar and step are on the same chromosome, barring recombination in the female parents, none of the offspring are homozygous for one mutation and simultaneously heterozygous for the other. Thus, this experiment did not test for interaction between these genes (unless you invoke maternal effect, which would require a different experimental design to properly test). The comparisons between Arp3 and step are somewhat less problematic, but given that the overall lethality is consistent with additive effects rather than enhancement, I do not think this result is interpretable without being able to distinguish specific genotypes in the offspring. Given these concerns, your manuscript cannot be accepted for publication at this time.

Thank you for the opportunity to examine this work. We hope that as your studies progress you will consider submitting future manuscripts to *Molecular Biology of the Cell* (MBoC).

If you have any questions regarding the decision, please contact the MBoC Editorial Office ([mboc@ascb.org](mailto:mboc@ascb.org)).

Sincerely,  
Rick Fehon  
Monitoring Editor  
*Molecular Biology of the Cell*

-----



RE: Manuscript #E22-03-0107R-A

TITLE: "SCAR/WAVE complex recruitment to a supracellular actomyosin cable by myosin activators and a junctional Arf-GEF during *Drosophila* dorsal closure"

Dear Tony,

Thank you for submitting the revised version in the format of a brief report. I agree that in this form the manuscript is substantially improved and better conveys your findings. I am pleased to accept your manuscript for publication in *Molecular Biology of the Cell*. Congratulations to you and your colleagues on this work.

Best,

Rick

Richard Fehon  
Monitoring Editor  
*Molecular Biology of the Cell*

-----  
Dear Prof. Harris:

Congratulations on the acceptance of your manuscript.

A PDF of your manuscript will be published on MBoC in Press, an early release version of the journal, within 10 days. The date your manuscript appears at [www.molbiolcell.org/toc/mboC/0/0](http://www.molbiolcell.org/toc/mboC/0/0) is the official publication date. Your manuscript will also be scheduled for publication in the next available issue of MBoC.

Within approximately four weeks you will receive a PDF page proof of your article.

Would you like to see an image related to your accepted manuscript on the cover of MBoC? Please contact the MBoC Editorial Office at [mboc@ascb.org](mailto:mboc@ascb.org) to learn how to submit an image.

Authors of Articles and Brief Communications are encouraged to create a short video abstract to accompany their article when it is published. These video abstracts, known as Science Sketches, are up to 2 minutes long and will be published on YouTube and then embedded in the article abstract. Science Sketch Editors on the MBoC Editorial Board will provide guidance as you prepare your video. Information about how to prepare and submit a video abstract is available at [www.molbiolcell.org/science-sketches](http://www.molbiolcell.org/science-sketches). Please contact [mboc@ascb.org](mailto:mboc@ascb.org) if you are interested in creating a Science Sketch.

We are pleased that you chose to publish your work in MBoC.

Sincerely,

Eric Baker  
Journal Production Manager  
MBoC Editorial Office  
[mbc@ascb.org](mailto:mbc@ascb.org)

-----
